# Supplementary material for: Global, Regional and National Burden of Human Cystic Echinococcosis from 1990 to 2019: A Systematic Analysis for the Global Burden of Disease Study 2019
Source: MDPI journal article supplement (doi:10.3390/tropicalmed9040087), 2024-04-17
Supplement: s1 [file s1]

## Supplementary Materails

**Table S1.** Incidence of Cystic echinococcosis in 1990 and 2019 in 204 countries, with EAPC from 1990 and 2019.

| location            | Num_1990         | ASR_1990             | Num_2019          | ASR_2019             | Num_change              | EAPC_CI                 |
|---------------------|------------------|----------------------|-------------------|----------------------|-------------------------|-------------------------|
| Afghanistan         | 527 (294–872)    | 5.29 (2.93–8.4)      | 1759 (878–3063)   | 5.24 (2.91–8.39)     | 2.34% (1.78–2.68)       | –0.08% (–0.1––0.06)     |
| Albania             | 35 (26–45)       | 1.13 (0.88–1.4)      | 35 (28–43)        | 1.14 (0.88–1.4)      | 0% (–0.12–0.15)         | 0.01% (0.01–0.01)       |
| Algeria             | 2987 (1546–5032) | 13.09 (7.34–21.02)   | 5586 (3001–9111)  | 13.17 (7.32–20.72)   | 0.87% (0.48–1.36)       | –0.02% (–0.04–0)        |
| American Samoa      | 0 (0–0)          | 0.07 (0.05–0.09)     | 0 (0–0)           | 0.07 (0.05–0.09)     | 0.19% (0.1–0.29)        | 0.12% (0.1–0.14)        |
| Andorra             | 0 (0–0)          | 0.42 (0.17–0.81)     | 0 (0–1)           | 0.41 (0.17–0.78)     | 0.65% (0.19–1.23)       | 0.02% (0.01–0.04)       |
| Angola              | 158 (100–232)    | 1.77 (1.23–2.45)     | 471 (301–688)     | 1.79 (1.24–2.46)     | 1.98% (1.87–2.11)       | 0.06% (0.05–0.06)       |
| Antigua and Barbuda | 0 (0–0)          | 0.01 (0.01–0.02)     | 0 (0–0)           | 0.01 (0.01–0.02)     | 0.48% (0.26–0.72)       | –0.06% (–0.02–<br>0.09) |
| Argentina           | 177 (143–216)    | 0.54 (0.44–0.66)     | 256 (207–310)     | 0.54 (0.43–0.65)     | 0.45% (0.37–0.52)       | 0% (0–0.01)             |
| Armenia             | 1902 (873–3500)  | 56.48 (26.55–101.85) | 1849 (862–3383)   | 56.11 (25.8–100.3)   | –0.03% (–0.21–<br>0.21) | –0.01% (–0.03–0)        |
| Australia           | 4 (3–5)          | 0.02 (0.02–0.03)     | 7 (5–10)          | 0.02 (0.02–0.03)     | 0.78% (0.68–0.87)       | 0% (0–0)                |
| Austria             | 30 (25–35)       | 0.35 (0.29–0.42)     | 31 (26–37)        | 0.32 (0.26–0.39)     | 0.05% (–0.03–0.14)      | –0.41% (–0.67–<br>0.15) |
| Azerbaijan          | 3958 (1726–7618) | 56.26 (25.42–99.52)  | 6198 (2739–11638) | 55.83 (25.38–102.43) | 0.57% (0.25–0.9)        | –0.02% (–0.04–<br>0.01) |
| Bahamas             | 0 (0–0)          | 0.01 (0.01–0.02)     | 0 (0–0)           | 0.01 (0.01–0.02)     | 0.53% (0.3–0.84)        | –0.07% (–0.1––0.03)     |
| Bahrain             | 3 (1–6)          | 0.65 (0.31–1.14)     | 11 (5–21)         | 0.66 (0.31–1.18)     | 2.21% (1.43–3.4)        | 0.02% (0–0.04)          |
| Bangladesh          | 1466 (305–4270)  | 1.76 (0.42–5.59)     | 2735 (618–8823)   | 1.77 (0.43–5.74)     | 0.87% (0.38–1.54)       | 0.01% (–0.01–0.03)      |
| Barbados            | 0 (0–0)          | 0.01 (0.01–0.02)     | 0 (0–0)           | 0.01 (0.01–0.02)     | 0.21% (0.03–0.44)       | –0.08% (–0.11–<br>0.06) |
| Belarus             | 763 (625–918)    | 6.57 (5.43–7.91)     | 765 (621–919)     | 6.53 (5.41–7.8)      | 0% (–0.07–0.08)         | –0.01% (–0.01–<br>0.01) |
| Belgium             | 5 (4–6)          | 0.04 (0.03–0.05)     | 8 (7–10)          | 0.06 (0.05–0.08)     | 0.74% (0.61–0.92)       | 1.12% (0.81–1.43)       |
| Belize              | 0 (0–0)          | 0.01 (0.01–0.02)     | 0 (0–0)           | 0.01 (0.01–0.02)     | 1.26% (0.98–1.63)       | –0.07% (–0.11–<br>0.03) |
| Benin               | 62 (40–92)       | 1.54 (1.05–2.15)     | 175 (110–262)     | 1.55 (1.05–2.16)     | 1.82% (1.71–1.95)       | 0.06% (0.04–0.07)       |

| location                         | Num_1990          | ASR_1990         | Num_2019          | ASR_2019         | Num_change          | EAPC_CI             |
|----------------------------------|-------------------|------------------|-------------------|------------------|---------------------|---------------------|
| Bermuda                          | 0 (0–0)           | 0.29 (0.23–0.37) | 0 (0–0)           | 0.29 (0.23–0.36) | 0.2% (0.05–0.37)    | –0.06% (–0.08–0.03) |
| Bhutan                           | 8 (2–24)          | 1.78 (0.44–5.55) | 13 (3–39)         | 1.74 (0.41–5.46) | 0.51% (0.09–1.05)   | –0.16% (–0.19–0.12) |
| Bolivia (Plurinational State of) | 0 (0–1)           | 0.01 (0–0.01)    | 1 (0–1)           | 0.01 (0–0.01)    | 0.96% (0.71–1.34)   | –0.03% (–0.04–0.02) |
| Bosnia and Herzegovina           | 147 (116–182)     | 3.16 (2.5–3.87)  | 122 (97–152)      | 3.13 (2.47–3.89) | –0.17% (–0.25–0.07) | –0.03% (–0.03–0.02) |
| Botswana                         | 0 (0–0)           | 0 (0–0.01)       | 0 (0–0)           | 0 (0–0.01)       | 0.7% (0.44–1.12)    | 0.01% (0.01–0.01)   |
| Brazil                           | 804 (255–2013)    | 0.64 (0.23–1.77) | 167 (89–321)      | 0.07 (0.04–0.14) | –0.79% (–0.87–0.62) | –6.65% (–7.06–6.23) |
| Brunei Darussalam                | 0 (0–0)           | 0.01 (0–0.01)    | 0 (0–0)           | 0.01 (0–0.01)    | 0.76% (0.52–1.13)   | 0.01% (0.01–0.01)   |
| Bulgaria                         | 305 (243–374)     | 3.15 (2.48–3.87) | 257 (205–321)     | 3.13 (2.48–3.87) | –0.16% (–0.22–0.07) | –0.03% (–0.03–0.02) |
| Burkina Faso                     | 125 (77–187)      | 1.55 (1.06–2.22) | 314 (196–472)     | 1.57 (1.07–2.23) | 1.52% (1.41–1.63)   | 0.06% (0.05–0.07)   |
| Burundi                          | 4 (3–6)           | 0.07 (0.05–0.1)  | 9 (6–12)          | 0.07 (0.05–0.1)  | 1.21% (1.08–1.35)   | 0.% (0–0.01)        |
| Cabo Verde                       | 5 (3–7)           | 1.52 (1.03–2.14) | 9 (6–13)          | 1.53 (1.04–2.16) | 0.81% (0.58–1.14)   | 0.04% (0.03–0.06)   |
| Cambodia                         | 10 (2–29)         | 0.09 (0.03–0.24) | 17 (4–49)         | 0.1 (0.03–0.28)  | 0.77% (0.5–1.4)     | 0.11% (0.06–0.16)   |
| Cameroon                         | 47 (28–75)        | 0.53 (0.35–0.77) | 147 (86–236)      | 0.54 (0.35–0.79) | 2.09% (1.94–2.26)   | 0.09% (0.07–0.11)   |
| Canada                           | 17 (13–21)        | 0.06 (0.05–0.07) | 26 (21–32)        | 0.06 (0.05–0.07) | 0.52% (0.39–0.67)   | –0.07% (–0.08–0.06) |
| Central African Republic         | 43 (28–64)        | 1.79 (1.24–2.49) | 87 (56–128)       | 1.8 (1.25–2.5)   | 1.01% (0.92–1.1)    | 0.02% (0.02–0.03)   |
| Chad                             | 78 (49–114)       | 1.53 (1.06–2.14) | 215 (132–324)     | 1.55 (1.06–2.15) | 1.76% (1.59–1.93)   | 0.07% (0.05–0.08)   |
| Chile                            | 141 (119–166)     | 1.14 (0.97–1.33) | 292 (254–335)     | 1.44 (1.25–1.66) | 1.07% (0.91–1.24)   | 0.4% (–0.18–0.99)   |
| China                            | 4975 (1540–11580) | 0.41 (0.14–0.89) | 6665 (2962–13327) | 0.46 (0.19–0.95) | 0.34% (–0.06–1.07)  | 0.57% (0.49–0.65)   |
| Colombia                         | 6 (4–8)           | 0.02 (0.02–0.03) | 11 (8–15)         | 0.02 (0.02–0.03) | 0.84% (0.59–1.16)   | 0.04% (0.03–0.04)   |
| Comoros                          | 0 (0–0)           | 0.01 (0.01–0.02) | 0 (0–0)           | 0.01 (0.01–0.02) | 0.59% (0.38–0.89)   | 0.01% (0–0.02)      |
| Congo                            | 14 (8–22)         | 0.64 (0.42–0.91) | 32 (20–48)        | 0.65 (0.43–0.93) | 1.27% (1.07–1.59)   | 0.05% (0.04–0.06)   |
| Cook Islands                     | 0 (0–0)           | 0 (0–0)          | 0 (0–0)           | 0 (0–0)          | 0% (0–0)            | 0% (0–0)            |
| Costa Rica                       | 1 (0–1)           | 0.02 (0.02–0.03) | 1 (1–1)           | 0.02 (0.02–0.03) | 0.95% (0.69–1.3)    | 0.04% (0.03–0.04)   |

| location                              | Num_1990         | ASR_1990         | Num_2019         | ASR_2019         | Num_change          | EAPC_CI             |
|---------------------------------------|------------------|------------------|------------------|------------------|---------------------|---------------------|
| Croatia                               | 121 (101–142)    | 2.21 (1.85–2.6)  | 95 (82–110)      | 1.92 (1.65–2.23) | –0.21% (–0.27–0.14) | –0.42% (–0.47–0.37) |
| Cuba                                  | 2 (1–2)          | 0.01 (0.01–0.02) | 2 (1–3)          | 0.01 (0.01–0.02) | 0.13% (–0.08–0.37)  | –0.07% (–0.11–0.04) |
| Cyprus                                | 2 (1–2)          | 0.21 (0.17–0.27) | 4 (3–5)          | 0.26 (0.22–0.32) | 1.28% (1.07–1.56)   | 0.44% (0.28–0.61)   |
| Czechia                               | 39 (31–47)       | 0.34 (0.27–0.42) | 42 (33–51)       | 0.33 (0.26–0.4)  | 0.07% (–0.02–0.16)  | –0.13% (–0.19–0.08) |
| Democratic People's Republic of Korea | 96 (21–261)      | 0.48 (0.1–1.28)  | 128 (30–335)     | 0.48 (0.11–1.24) | 0.32% (0.06–0.76)   | 0.03% (–0.02–0.08)  |
| Democratic Republic of the Congo      | 589 (374–876)    | 1.78 (1.24–2.45) | 1427 (908–2117)  | 1.79 (1.24–2.47) | 1.42% (1.33–1.53)   | 0.03% (0.02–0.04)   |
| Denmark                               | 0 (0–0)          | 0 (0–0)          | 0 (0–0)          | 0.01 (0–0.01)    | 0.98% (0.38–2.23)   | 0.72% (0.28–1.17)   |
| Djibouti                              | 0 (0–0)          | 0.07 (0.05–0.1)  | 1 (1–1)          | 0.07 (0.05–0.1)  | 1.52% (1.25–1.87)   | 0.02% (0.02–0.03)   |
| Dominica                              | 0 (0–0)          | 0.01 (0.01–0.02) | 0 (0–0)          | 0.01 (0.01–0.02) | –0.05% (–0.16–0.11) | –0.08% (–0.11–0.06) |
| Dominican Republic                    | 1 (1–2)          | 0.01 (0.01–0.02) | 2 (1–2)          | 0.01 (0.01–0.02) | 0.55% (0.35–0.84)   | –0.07% (–0.11–0.04) |
| Ecuador                               | 0 (0–1)          | 0 (0–0.01)       | 1 (0–1)          | 0 (0–0.01)       | 1.01% (0.52–1.71)   | 0.25% (–0.1–0.61)   |
| Egypt                                 | 2661 (1433–4416) | 5.21 (3–8.45)    | 5094 (2746–8425) | 5.2 (2.94–8.38)  | 0.91% (0.76–1.12)   | –0.03% (–0.04–0.02) |
| El Salvador                           | 5 (4–6)          | 0.11 (0.08–0.13) | 7 (5–8)          | 0.11 (0.08–0.14) | 0.38% (0.26–0.51)   | 0.04% (0.04–0.05)   |
| Equatorial Guinea                     | 1 (0–1)          | 0.16 (0.09–0.24) | 2 (1–4)          | 0.15 (0.09–0.24) | 2.71% (2.39–3)      | –0.07% (–0.07–0.06) |
| Eritrea                               | 11 (8–15)        | 0.39 (0.3–0.5)   | 26 (20–35)       | 0.39 (0.3–0.5)   | 1.35% (1.23–1.46)   | 0.02% (0.01–0.02)   |
| Estonia                               | 44 (36–53)       | 2.49 (2.04–3)    | 39 (32–48)       | 2.46 (2.03–2.97) | –0.1% (–0.16–0.02)  | –0.04% (–0.04–0.03) |
| Eswatini                              | 0 (0–0)          | 0 (0–0.01)       | 0 (0–0)          | 0 (0–0.01)       | 0.39% (0.16–0.75)   | 0.01% (0.01–0.01)   |
| Ethiopia                              | 629 (481–797)    | 1.29 (1.04–1.61) | 1372 (1051–1745) | 1.29 (1.03–1.6)  | 1.18% (1.1–1.26)    | –0.01% (–0.01–0)    |
| Fiji                                  | 0 (0–0)          | 0 (0–0.01)       | 0 (0–0)          | 0 (0–0.01)       | 0.15% (–0.08–0.48)  | 0.05% (0.04–0.06)   |
| Finland                               | 0 (0–0)          | 0 (0–0.01)       | 0 (0–0)          | 0 (0–0.01)       | 0.17% (–0.2–0.88)   | –0.02% (–0.26–0.23) |
| France                                | 54 (19–116)      | 0.09 (0.03–0.2)  | 64 (24–141)      | 0.09 (0.03–0.2)  | 0.19% (–0.08–0.5)   | 0.01% (–0.04–0.07)  |
| Gabon                                 | 6 (3–9)          | 0.63 (0.41–0.91) | 11 (7–17)        | 0.64 (0.41–0.93) | 0.94% (0.82–1.13)   | 0.07% (0.06–0.09)   |

| location                   | Num_1990         | ASR_1990           | Num_2019          | ASR_2019           | Num_change          | EAPC_CI             |
|----------------------------|------------------|--------------------|-------------------|--------------------|---------------------|---------------------|
| Gambia                     | 4 (3–7)          | 0.52 (0.35–0.77)   | 11 (7–18)         | 0.53 (0.35–0.78)   | 1.52% (1.42–1.62)   | 0.09% (0.07–0.1)    |
| Georgia                    | 381 (313–468)    | 6.52 (5.35–8.01)   | 210 (176–251)     | 5.26 (4.42–6.3)    | –0.45% (–0.51–0.39) | –1.04% (–1.23–0.85) |
| Germany                    | 2 (1–3)          | 0 (0–0)            | 4 (2–6)           | 0 (0–0.01)         | 0.8% (0.15–2.42)    | 1.78% (1.28–2.28)   |
| Ghana                      | 203 (131–299)    | 1.53 (1.06–2.12)   | 476 (316–696)     | 1.56 (1.08–2.18)   | 1.34% (1.18–1.5)    | 0.07% (0.06–0.08)   |
| Greece                     | 0 (0–1)          | 0 (0–0.01)         | 0 (0–0)           | 0 (0–0)            | –0.1% (–0.33–0.2)   | –0.43% (–0.68–0.17) |
| Greenland                  | 0 (0–0)          | 0.01 (0.01–0.02)   | 0 (0–0)           | 0.01 (0.01–0.02)   | 0.14% (–0.02–0.37)  | –0.09% (–0.1–0.08)  |
| Grenada                    | 0 (0–0)          | 0.01 (0.01–0.02)   | 0 (0–0)           | 0.01 (0.01–0.02)   | 0.21% (0.02–0.44)   | –0.08% (–0.12–0.05) |
| Guam                       | 0 (0–0)          | 0.01 (0.01–0.02)   | 0 (0–0)           | 0.01 (0.01–0.02)   | 0.25% (0.12–0.43)   | 0.14% (0.12–0.16)   |
| Guatemala                  | 1 (1–2)          | 0.02 (0.02–0.03)   | 3 (2–5)           | 0.02 (0.02–0.03)   | 1.46% (1.2–1.72)    | 0.05% (0.04–0.06)   |
| Guinea                     | 28 (17–44)       | 0.53 (0.34–0.78)   | 61 (36–97)        | 0.54 (0.35–0.8)    | 1.18% (1.03–1.3)    | 0.09% (0.07–0.11)   |
| Guinea–Bissau              | 14 (8–20)        | 1.55 (1.05–2.16)   | 28 (18–41)        | 1.57 (1.07–2.18)   | 1.05% (0.95–1.15)   | 0.06% (0.05–0.08)   |
| Guyana                     | 2 (2–3)          | 0.29 (0.23–0.37)   | 2 (2–3)           | 0.29 (0.22–0.36)   | 0.03% (–0.05–0.15)  | –0.07% (–0.09–0.04) |
| Haiti                      | 1 (1–1)          | 0.01 (0.01–0.02)   | 2 (1–3)           | 0.01 (0.01–0.02)   | 0.96% (0.75–1.24)   | –0.07% (–0.1–0.04)  |
| Honduras                   | 1 (1–1)          | 0.02 (0.02–0.03)   | 2 (1–3)           | 0.02 (0.02–0.03)   | 1.34% (1.08–1.61)   | 0.03% (0.02–0.04)   |
| Hungary                    | 133 (105–164)    | 1.15 (0.9–1.43)    | 130 (102–161)     | 1.14 (0.89–1.42)   | –0.02% (–0.1–0.06)  | –0.03% (–0.04–0.03) |
| Iceland                    | 0 (0–0)          | 0 (0–0)            | 0 (0–0)           | 0 (0–0)            | 0.3% (–0.05–0.78)   | 0% (0–0)            |
| India                      | 4314 (3416–5378) | 0.57 (0.46–0.69)   | 9041 (7379–10973) | 0.66 (0.54–0.79)   | 1.1% (0.96–1.25)    | 0.69% (0.56–0.82)   |
| Indonesia                  | 499 (119–1524)   | 0.26 (0.07–0.74)   | 354 (97–957)      | 0.14 (0.04–0.36)   | –0.29% (–0.45–0.01) | –3.23% (–3.82–2.64) |
| Iran (Islamic Republic of) | 3029 (2435–3750) | 5.97 (4.94–7.17)   | 5760 (4753–6977)  | 6.55 (5.4–7.93)    | 0.9% (0.69–1.17)    | 0.19% (0.09–0.3)    |
| Iraq                       | 1972 (1013–3322) | 13.05 (7.38–20.85) | 5489 (2905–8992)  | 13.08 (7.38–20.67) | 1.78% (1.45–2.12)   | –0.03% (–0.04–0.01) |
| Ireland                    | 3 (1–7)          | 0.07 (0.02–0.18)   | 4 (1–9)           | 0.07 (0.02–0.18)   | 0.39% (0.06–1.01)   | 0.11% (0.09–0.13)   |
| Israel                     | 20 (8–37)        | 0.41 (0.17–0.77)   | 39 (18–71)        | 0.41 (0.17–0.77)   | 0.97% (0.66–1.33)   | 0.04% (0.03–0.06)   |
| Italy                      | 559 (466–658)    | 0.9 (0.75–1.08)    | 4295 (3667–5032)  | 5.76 (4.88–6.83)   | 6.69% (5.84–7.64)   | 0.94% (–0.65–2.56)  |

| location                            | Num_1990            | ASR_1990                   | Num_2019            | ASR_2019                  | Num_change               | EAPC_CI                  |
|-------------------------------------|---------------------|----------------------------|---------------------|---------------------------|--------------------------|--------------------------|
| Jamaica                             | 0 (0–1)             | 0.01 (0.01–0.02)           | 0 (0–1)             | 0.01 (0.01–0.02)          | 0.23% (0.07–0.44)        | –0.07% (–0.11–<br>–0.04) |
| Japan                               | 79 (23–239)         | 0.06 (0.02–0.18)           | 33 (17–69)          | 0.03 (0.01–0.06)          | –0.59% (–0.73–<br>–0.2)  | –3.79% (–4.57–<br>–3.01) |
| Jordan                              | 182 (144–224)       | 5.64 (4.63–6.69)           | 1000 (825–1206)     | 8.55 (7.11–10.07)         | 4.5% (4.03–5.14)         | 2.06% (1.66–2.47)        |
| Kazakhstan                          | 26055 (21264–31968) | 164.09 (135.28–<br>197.75) | 23986 (19796–28908) | 127.56 (105.34–<br>153.8) | –0.08% (–0.14–<br>–0.01) | –1.22% (–1.44–<br>–0.99) |
| Kenya                               | 254 (192–322)       | 1.14 (0.91–1.41)           | 579 (446–736)       | 1.13 (0.9–1.41)           | 1.29% (1.2–1.38)         | 0.03% (–0.02–0.08)       |
| Kiribati                            | 0 (0–0)             | 0 (0–0.01)                 | 0 (0–0)             | 0 (0–0.01)                | 0.63% (0.34–0.99)        | 0.06% (0.05–0.07)        |
| Kuwait                              | 88 (44–147)         | 5.01 (2.76–7.92)           | 251 (132–450)       | 5.15 (2.87–8.18)          | 1.86% (1.26–2.52)        | 0.06% (0.04–0.08)        |
| Kyrgyzstan                          | 2757 (2259–3382)    | 68.56 (56.57–82.4)         | 6211 (5183–7653)    | 95.61 (80.36–116.11)      | 1.25% (1.08–1.45)        | 1.30% (0.94–1.67)        |
| Lao People's<br>Democratic Republic | 4 (1–14)            | 0.1 (0.03–0.28)            | 8 (2–23)            | 0.11 (0.03–0.31)          | 0.79% (0.45–1.14)        | 0.03% (0.02–0.05)        |
| Latvia                              | 63 (51–76)          | 2.04 (1.67–2.46)           | 43 (37–50)          | 1.82 (1.56–2.13)          | –0.31% (–0.38–<br>–0.23) | –0.23% (–0.31–<br>–0.16) |
| Lebanon                             | 398 (214–651)       | 13.14 (7.32–21.37)         | 689 (380–1124)      | 13.21 (7.38–20.88)        | 0.73% (0.48–0.99)        | –0.02% (–0.04–0)         |
| Lesotho                             | 0 (0–0)             | 0 (0–0.01)                 | 0 (0–0)             | 0 (0–0.01)                | 0.14% (–0.07–0.46)       | 0.02% (0.02–0.03)        |
| Liberia                             | 9 (5–14)            | 0.53 (0.34–0.78)           | 25 (14–39)          | 0.54 (0.35–0.8)           | 1.72% (1.52–1.91)        | 0.06% (0.05–0.08)        |
| Libya                               | 484 (245–832)       | 12.87 (7.24–20.5)          | 962 (520–1587)      | 13.1 (7.31–20.88)         | 0.99% (0.55–1.56)        | 0% (–0.02–0.03)          |
| Lithuania                           | 115 (96–139)        | 2.89 (2.41–3.44)           | 85 (74–98)          | 2.46 (2.11–2.86)          | –0.27% (–0.33–<br>–0.19) | –0.4% (–0.57––0.22)      |
| Luxembourg                          | 0 (0–0)             | 0.04 (0.03–0.05)           | 0 (0–0)             | 0.04 (0.03–0.05)          | 0.6% (0.37–0.85)         | –0.08% (–0.26––0.1)      |
| Madagascar                          | 8 (6–12)            | 0.07 (0.05–0.1)            | 20 (13–29)          | 0.07 (0.05–0.1)           | 1.32% (1.17–1.5)         | 0.02% (0.01–0.03)        |
| Malawi                              | 36 (26–48)          | 0.39 (0.3–0.5)             | 74 (54–99)          | 0.39 (0.3–0.5)            | 1.05% (0.95–1.15)        | 0.01% (0–0.02)           |
| Malaysia                            | 18 (5–54)           | 0.1 (0.03–0.26)            | 32 (9–86)           | 0.1 (0.03–0.27)           | 0.77% (0.5–1.4)          | 0.01% (0.01–0.01)        |
| Maldives                            | 0 (0–1)             | 0.1 (0.03–0.28)            | 0 (0–1)             | 0.1 (0.03–0.28)           | 1.14% (0.45–2.35)        | 0.01% (–0.01–0.03)       |
| Mali                                | 112 (73–164)        | 1.54 (1.04–2.12)           | 298 (187–447)       | 1.55 (1.04–2.15)          | 1.65% (1.49–1.78)        | 0.05% (0.04–0.06)        |
| Malta                               | 0 (0–0)             | 0 (0–0)                    | 0 (0–0)             | 0 (0–0)                   | 0.12% (–0.15–0.5)        | 0.03% (0.02–0.04)        |
| Marshall Islands                    | 0 (0–0)             | 0 (0–0.01)                 | 0 (0–0)             | 0 (0–0.01)                | 0.19% (–0.08–0.58)       | 0.06% (0.05–0.07)        |
| Mauritania                          | 28 (18–40)          | 1.52 (1.04–2.13)           | 59 (38–86)          | 1.54 (1.04–2.15)          | 1.13% (1.06–1.21)        | 0.07% (0.06–0.08)        |
| Mauritius                           | 1 (0–4)             | 0.1 (0.03–0.3)             | 1 (0–3)             | 0.1 (0.03–0.3)            | 0.1% (–0.15–0.81)        | 0% (0–0)                 |

| location                         | Num_1990         | ASR_1990             | Num_2019         | ASR_2019             | Num_change          | EAPC_CI              |
|----------------------------------|------------------|----------------------|------------------|----------------------|---------------------|----------------------|
| Mexico                           | 74 (19–234)      | 0.09 (0.02–0.29)     | 58 (22–148)      | 0.05 (0.02–0.12)     | –0.22% (–0.45–0.47) | –1.68% (–2.45––0.91) |
| Micronesia (Federated States of) | 0 (0–0)          | 0 (0–0.01)           | 0 (0–0)          | 0 (0–0.01)           | –0.04% (–0.25–0.27) | 0.06% (0.05–0.08)    |
| Monaco                           | 0 (0–0)          | 0 (0–0)              | 0 (0–0)          | 0 (0–0)              | 0% (0–0)            | 0% (0–0)             |
| Mongolia                         | 1036 (433–2102)  | 55.98 (25.19–100.22) | 1858 (815–3484)  | 55.52 (25.61–100.56) | 0.79% (0.4–1.29)    | 0% (–0.02–0.01)      |
| Montenegro                       | 7 (6–9)          | 1.14 (0.9–1.41)      | 8 (6–10)         | 1.14 (0.9–1.41)      | 0.09% (0–0.21)      | –0.02% (–0.03––0.02) |
| Morocco                          | 3097 (1623–5184) | 13.12 (7.19–21.2)    | 4938 (2672–7969) | 13.18 (7.26–21)      | 0.59% (0.35–0.91)   | –0.03% (–0.05––0.01) |
| Mozambique                       | 50 (36–65)       | 0.39 (0.31–0.51)     | 114 (83–151)     | 0.39 (0.3–0.5)       | 1.29% (1.18–1.43)   | –0.01% (–0.01–0)     |
| Myanmar                          | 44 (11–133)      | 0.11 (0.03–0.28)     | 59 (15–167)      | 0.11 (0.03–0.3)      | 0.33% (0.12–0.75)   | 0.02% (0.01–0.03)    |
| Namibia                          | 0 (0–0)          | 0 (0–0)              | 0 (0–0)          | 0 (0–0)              | 0.68% (0.43–1.08)   | 0.06% (0.05–0.07)    |
| Nauru                            | 0 (0–0)          | 0 (0–0)              | 0 (0–0)          | 0 (0–0)              | 0% (0–0)            | 0% (0–0)             |
| Nepal                            | 1 (0–1)          | 0 (0–0.01)           | 2 (1–2)          | 0.01 (0–0.01)        | 0.92% (0.48–1.57)   | 0.73% (0.58–0.88)    |
| Netherlands                      | 14 (4–30)        | 0.09 (0.03–0.19)     | 16 (6–35)        | 0.09 (0.03–0.2)      | 0.19% (–0.06–0.55)  | 0.05% (0–0.1)        |
| New Zealand                      | 1 (1–2)          | 0.03 (0.02–0.05)     | 2 (1–3)          | 0.04 (0.02–0.06)     | 0.71% (0.34–1.05)   | 0.12% (–0.12–0.36)   |
| Nicaragua                        | 1 (0–1)          | 0.02 (0.02–0.03)     | 1 (1–2)          | 0.02 (0.02–0.03)     | 1.02% (0.75–1.35)   | 0.04% (0.03–0.04)    |
| Niger                            | 102 (63–153)     | 1.53 (1.05–2.15)     | 302 (183–464)    | 1.55 (1.06–2.19)     | 1.97% (1.83–2.1)    | 0.06% (0.05–0.07)    |
| Nigeria                          | 419 (248–657)    | 0.52 (0.34–0.76)     | 1055 (610–1725)  | 0.53 (0.35–0.79)     | 1.52% (1.37–1.68)   | 0.12% (0.1–0.14)     |
| Niue                             | 0 (0–0)          | 0 (0–0)              | 0 (0–0)          | 0 (0–0)              | 0% (0–0)            | 0% (0–0)             |
| North Macedonia                  | 23 (18–29)       | 1.14 (0.9–1.4)       | 28 (22–34)       | 1.13 (0.88–1.39)     | 0.18% (0.08–0.3)    | –0.04% (–0.05––0.04) |
| Northern Mariana Islands         | 0 (0–0)          | 0.01 (0.01–0.02)     | 0 (0–0)          | 0.01 (0.01–0.02)     | –0.08% (–0.21–0.15) | 0.13% (0.11–0.16)    |
| Norway                           | 9 (6–12)         | 0.2 (0.13–0.27)      | 22 (15–30)       | 0.37 (0.25–0.52)     | 1.42% (1.18–1.68)   | 2.42% (1.75–3.11)    |
| Oman                             | 85 (45–145)      | 4.94 (2.83–7.88)     | 237 (119–415)    | 4.9 (2.8–7.67)       | 1.77% (1.21–2.3)    | –0.04% (–0.1–0.01)   |
| Pakistan                         | 1532 (335–4485)  | 1.75 (0.42–5.49)     | 3195 (635–9540)  | 1.74 (0.4–5.58)      | 1.08% (0.79–1.32)   | –0.01% (–0.02–0.01)  |
| Palau                            | 0 (0–0)          | 0 (0–0)              | 0 (0–0)          | 0 (0–0)              | 0% (0–0)            | 0% (0–0)             |
| Palestine                        | 226 (117–387)    | 13.16 (7.3–21.21)    | 621 (332–1027)   | 13.11 (7.41–20.54)   | 1.75% (1.49–2.04)   | –0.05% (–0.07––0.03) |
| Panama                           | 0 (0–1)          | 0.02 (0.02–0.03)     | 1 (1–1)          | 0.02 (0.02–0.03)     | 1.03% (0.81–1.29)   | 0.03% (0.02–0.03)    |

| location                            | Num_1990            | ASR_1990            | Num_2019            | ASR_2019           | Num_change              | EAPC_CI                  |
|-------------------------------------|---------------------|---------------------|---------------------|--------------------|-------------------------|--------------------------|
| Papua New Guinea                    | 0 (0–0)             | 0 (0–0.01)          | 0 (0–1)             | 0 (0–0.01)         | 1.41% (0.94–1.95)       | 0.06% (0.05–0.07)        |
| Paraguay                            | 12 (10–15)          | 0.38 (0.31–0.46)    | 24 (20–29)          | 0.37 (0.31–0.45)   | 0.96% (0.83–1.12)       | –0.01% (–0.01–0)         |
| Peru                                | 6 (5–9)             | 0.03 (0.03–0.04)    | 11 (9–14)           | 0.03 (0.03–0.04)   | 0.75% (0.57–0.97)       | 0% (0–0)                 |
| Philippines                         | 2 (1–3)             | 0 (0–0)             | 3 (1–5)             | 0 (0–0)            | 0.71% (0.26–1.28)       | 0% (0–0)                 |
| Poland                              | 401 (328–485)       | 1 (0.81–1.22)       | 425 (366–493)       | 0.93 (0.79–1.09)   | 0.06% (–0.03–0.17)      | –0.1% (–0.15––0.04)      |
| Portugal                            | 45 (19–82)          | 0.41 (0.17–0.78)    | 52 (25–103)         | 0.41 (0.17–0.78)   | 0.17% (–0.14–0.56)      | 0% (–0.01–0.01)          |
| Puerto Rico                         | 11 (8–14)           | 0.29 (0.23–0.37)    | 12 (10–15)          | 0.29 (0.23–0.36)   | 0.11% (–0.03–0.27)      | –0.05% (–0.08–<br>–0.03) |
| Qatar                               | 8 (6–10)            | 1.68 (1.35–2.06)    | 52 (41–66)          | 1.68 (1.37–2.04)   | 5.9% (5.28–6.54)        | –0.21% (–0.36–<br>–0.06) |
| Republic of Korea                   | 14 (10–18)          | 0.03 (0.02–0.04)    | 18 (14–24)          | 0.03 (0.02–0.04)   | 0.35% (0.11–0.66)       | –0.02% (–0.03–<br>–0.01) |
| Republic of Moldova                 | 778 (643–929)       | 17.07 (14.15–20.34) | 768 (631–923)       | 16.93 (14–20.2)    | –0.01% (–0.09–<br>0.06) | –0.02% (–0.02–<br>–0.02) |
| Romania                             | 768 (640–926)       | 3.08 (2.54–3.71)    | 859 (737–985)       | 3.96 (3.42–4.6)    | 0.12% (0–0.25)          | 0.9% (0.65–1.16)         |
| Russian Federation                  | 17908 (14797–21262) | 10.79 (8.98–12.76)  | 19163 (15764–22876) | 10.89 (9.12–12.87) | 0.07% (0.01–0.13)       | 0.05% (0.03–0.06)        |
| Rwanda                              | 5 (3–7)             | 0.07 (0.05–0.1)     | 9 (6–14)            | 0.07 (0.05–0.1)    | 0.87% (0.73–1.02)       | –0.01% (–0.02–0)         |
| Saint Kitts and Nevis               | 0 (0–0)             | 0 (0–0)             | 0 (0–0)             | 0 (0–0)            | 0% (0–0)                | 0% (0–0)                 |
| Saint Lucia                         | 0 (0–0)             | 0.01 (0.01–0.02)    | 0 (0–0)             | 0.01 (0.01–0.02)   | 0.37% (0.12–0.74)       | –0.07% (–0.1––0.05)      |
| Saint Vincent and the<br>Grenadines | 0 (0–0)             | 0.01 (0.01–0.02)    | 0 (0–0)             | 0.01 (0.01–0.02)   | 0.08% (–0.12–0.35)      | –0.08% (–0.11–<br>–0.05) |
| Samoa                               | 0 (0–0)             | 0 (0–0.01)          | 0 (0–0)             | 0 (0–0.01)         | 0.28% (0.04–0.59)       | 0.06% (0.05–0.07)        |
| San Marino                          | 0 (0–0)             | 0 (0–0)             | 0 (0–0)             | 0 (0–0)            | 0% (0–0)                | 0% (0–0)                 |
| Sao Tome and Principe               | 0 (0–0)             | 0.12 (0.07–0.19)    | 0 (0–0)             | 0.12 (0.07–0.19)   | 0.88% (0.75–1.1)        | 0.1% (0.08–0.12)         |
| Saudi Arabia                        | 725 (370–1237)      | 4.99 (2.8–7.96)     | 1993 (1026–3486)    | 5.04 (2.85–7.98)   | 1.75% (1.13–2.47)       | 0.01% (–0.01–0.03)       |
| Senegal                             | 34 (20–55)          | 0.52 (0.35–0.76)    | 76 (45–121)         | 0.53 (0.35–0.79)   | 1.21% (1.07–1.36)       | 0.09% (0.07–0.11)        |
| Serbia                              | 226 (188–268)       | 2.22 (1.84–2.66)    | 248 (208–287)       | 2.42 (2.04–2.81)   | 0.1% (0–0.23)           | 0.34% (0.23–0.44)        |
| Seychelles                          | 0 (0–0)             | 0.1 (0.03–0.29)     | 0 (0–0)             | 0.1 (0.03–0.29)    | 0.28% (0.03–0.84)       | 0.02% (0.02–0.02)        |
| Sierra Leone                        | 17 (11–27)          | 0.53 (0.34–0.78)    | 42 (25–67)          | 0.54 (0.34–0.8)    | 1.47% (1.31–1.61)       | 0.07% (0.05–0.08)        |
| Singapore                           | 0 (0–0)             | 0.01 (0–0.01)       | 0 (0–1)             | 0.01 (0–0.01)      | 0.9% (0.53–1.39)        | 0.01% (0–0.01)           |
| Slovakia                            | 44 (36–54)          | 0.81 (0.65–0.98)    | 46 (38–54)          | 0.74 (0.6–0.89)    | 0.03% (–0.05–0.13)      | –0.25% (–0.33–<br>–0.16) |

| location                      | Num_1990          | ASR_1990              | Num_2019           | ASR_2019                  | Num_change         | EAPC_CI                  |
|-------------------------------|-------------------|-----------------------|--------------------|---------------------------|--------------------|--------------------------|
| Slovenia                      | 29 (24–35)        | 1.37 (1.11–1.65)      | 32 (27–37)         | 1.3 (1.08–1.56)           | 0.1% (0.01–0.2)    | –0.21% (–0.26–<br>–0.15) |
| Solomon Islands               | 0 (0–0)           | 0 (0–0.01)            | 0 (0–0)            | 0 (0–0.01)                | 0.92% (0.56–1.36)  | 0.06% (0.05–0.07)        |
| Somalia                       | 27 (19–36)        | 0.39 (0.3–0.49)       | 77 (56–103)        | 0.39 (0.3–0.5)            | 1.88% (1.72–2.08)  | 0% (0–0.01)              |
| South Africa                  | 19 (14–26)        | 0.05 (0.04–0.07)      | 28 (21–36)         | 0.05 (0.04–0.06)          | 0.46% (0.36–0.58)  | –0.06% (–0.08–<br>–0.05) |
| South Sudan                   | 71 (53–90)        | 1.25 (0.99–1.53)      | 114 (86–144)       | 1.26 (1.01–1.54)          | 0.61% (0.53–0.68)  | 0.04% (0.04–0.04)        |
| Spain                         | 1 (1–2)           | 0 (0–0)               | 1 (1–2)            | 0 (0–0)                   | 0.13% (–0.07–0.36) | –0.32% (–0.68–0.03)      |
| Sri Lanka                     | 18 (4–54)         | 0.1 (0.03–0.27)       | 22 (6–57)          | 0.1 (0.03–0.27)           | 0.22% (0.02–0.8)   | –0.01% (–0.01–<br>–0.01) |
| Sudan                         | 2288 (1202–3842)  | 13.1 (7.53–20.76)     | 5070 (2661–8432)   | 13.17 (7.47–20.85)        | 1.22% (1.06–1.41)  | –0.03% (–0.06–0.1)       |
| Suriname                      | 0 (0–0)           | 0.07 (0.06–0.1)       | 0 (0–1)            | 0.07 (0.05–0.09)          | 0.53% (0.38–0.74)  | –0.08% (–0.12–<br>–0.05) |
| Sweden                        | 23 (18–28)        | 0.25 (0.2–0.31)       | 44 (36–54)         | 0.41 (0.33–0.52)          | 0.92% (0.79–1.11)  | 1.37% (0.76–1.98)        |
| Switzerland                   | 7 (5–8)           | 0.09 (0.07–0.11)      | 11 (9–13)          | 0.1 (0.08–0.13)           | 0.6% (0.47–0.74)   | 0.41% (–0.13–0.95)       |
| Syrian Arab Republic          | 1439 (739–2441)   | 13.03 (7.32–20.82)    | 2027 (1129–3260)   | 13.37 (7.45–21.26)        | 0.41% (0.18–0.76)  | 0.03% (0–0.06)           |
| Taiwan (Province of<br>China) | 1 (0–1)           | 0 (0–0)               | 1 (0–1)            | 0 (0–0)                   | 0.06% (–0.3–0.7)   | 0.17% (0.13–0.2)         |
| Tajikistan                    | 5535 (2492–10858) | 123.34 (60.01–214.46) | 10887 (4891–20170) | 121.88 (58.57–<br>213.93) | 0.97% (0.71–1.33)  | –0.03% (–0.04–<br>–0.02) |
| Thailand                      | 65 (16–201)       | 0.11 (0.03–0.31)      | 73 (23–186)        | 0.11 (0.03–0.3)           | 0.13% (–0.25–1.1)  | –0.01% (–0.02–0)         |
| Timor–Leste                   | 1 (0–2)           | 0.1 (0.03–0.27)       | 1 (0–4)            | 0.1 (0.03–0.27)           | 0.85% (0.72–1.15)  | –0.01% (–0.01–0)         |
| Togo                          | 49 (30–74)        | 1.54 (1.05–2.15)      | 115 (74–168)       | 1.55 (1.06–2.18)          | 1.36% (1.2–1.6)    | 0.05% (0.04–0.06)        |
| Tokelau                       | 0 (0–0)           | 0 (0–0)               | 0 (0–0)            | 0 (0–0)                   | 0% (0–0)           | 0% (0–0)                 |
| Tonga                         | 0 (0–0)           | 0 (0–0.01)            | 0 (0–0)            | 0 (0–0.01)                | 0.04% (–0.16–0.28) | 0.06% (0.05–0.07)        |
| Trinidad and Tobago           | 0 (0–0)           | 0.01 (0.01–0.02)      | 0 (0–0)            | 0.01 (0.01–0.02)          | 0.24% (0.03–0.53)  | –0.09% (–0.12–<br>–0.06) |
| Tunisia                       | 1041 (560–1737)   | 13.11 (7.39–21.05)    | 1606 (913–2605)    | 13.18 (7.49–20.6)         | 0.54% (0.23–0.94)  | –0.04% (–0.06–<br>–0.01) |
| Turkey                        | 1906 (1525–2374)  | 3.36 (2.75–4.06)      | 3297 (2810–3826)   | 3.77 (3.22–4.38)          | 0.73% (0.52–0.98)  | 0.44% (0.32–0.57)        |
| Turkmenistan                  | 1825 (775–3600)   | 56.57 (26.03–101.9)   | 2822 (1231–5170)   | 55.86 (25.25–99.31)       | 0.55% (0.21–0.91)  | –0.04% (–0.07–<br>–0.01) |



| location                              | Num_1990           | ASR_1990              | Num_2019            | ASR_2019                  | Num_change              | EAPC_CI                  |
|---------------------------------------|--------------------|-----------------------|---------------------|---------------------------|-------------------------|--------------------------|
| Tuvalu                                | 0 (0–0)            | 0 (0–0)               | 0 (0–0)             | 0 (0–0)                   | 0% (0–0)                | 0% (0–0)                 |
| Uganda                                | 205 (156–259)      | 1.25 (1–1.54)         | 504 (379–646)       | 1.25 (1–1.53)             | 1.46% (1.35–1.57)       | 0.01% (0–0.01)           |
| Ukraine                               | 4125 (3381–4960)   | 6.84 (5.66–8.25)      | 3720 (3027–4504)    | 6.8 (5.66–8.19)           | –0.1% (–0.16–<br>–0.03) | –0.01% (–0.02–0)         |
| United Arab Emirates                  | 34 (16–60)         | 1.87 (1.02–3.05)      | 189 (95–372)        | 1.88 (1.02–3.08)          | 4.59% (3.15–6.48)       | –0.02% (–0.05–0.01)      |
| United Kingdom                        | 97 (25–298)        | 0.16 (0.04–0.46)      | 35 (14–74)          | 0.05 (0.02–0.12)          | –0.64% (–0.79–<br>0.42) | –2.99% (–4.05–<br>–1.92) |
| United Republic of<br>Tanzania        | 146 (108–193)      | 0.58 (0.46–0.73)      | 287 (214–371)       | 0.52 (0.4–0.65)           | 0.97% (0.85–1.11)       | –0.33% (–0.44–<br>–0.21) |
| United States of<br>America           | 113 (58–219)       | 0.04 (0.02–0.08)      | 92 (52–164)         | 0.02 (0.01–0.04)          | –0.19% (–0.39–<br>0.06) | –2.37% (–2.88–<br>–1.86) |
| United States Virgin<br>Islands       | 0 (0–0)            | 0.29 (0.23–0.37)      | 0 (0–0)             | 0.29 (0.23–0.36)          | 0.09% (–0.05–0.26)      | –0.07% (–0.09–<br>–0.04) |
| Uruguay                               | 18 (15–22)         | 0.54 (0.44–0.66)      | 21 (17–25)          | 0.54 (0.43–0.65)          | 0.16% (0.09–0.22)       | 0% (–0.01–0)             |
| Uzbekistan                            | 22460 (9914–43740) | 124.35 (57.81–220.68) | 41079 (18351–76048) | 123.53 (58.65–<br>219.16) | 0.83% (0.57–1.23)       | –0.03% (–0.05–<br>–0.01) |
| Vanuatu                               | 0 (0–0)            | 0 (0–0.01)            | 0 (0–0)             | 0 (0–0.01)                | 0.95% (0.54–1.46)       | 0.03% (0.02–0.04)        |
| Venezuela (Bolivarian<br>Republic of) | 3 (2–5)            | 0.02 (0.02–0.03)      | 6 (5–9)             | 0.02 (0.02–0.03)          | 0.89% (0.62–1.23)       | 0.02% (0.01–0.03)        |
| Viet Nam                              | 2 (1–3)            | 0 (0–0)               | 3 (1–4)             | 0 (0–0)                   | 0.36% (–0.01–1.06)      | 0.25% (0.2–0.29)         |
| Yemen                                 | 569 (292–961)      | 5.21 (2.89–8.1)       | 1525 (767–2630)     | 5.26 (2.89–8.42)          | 1.68% (1.46–1.92)       | 0.02% (0–0.03)           |
| Zambia                                | 30 (22–41)         | 0.39 (0.31–0.5)       | 71 (52–95)          | 0.39 (0.3–0.5)            | 1.34% (1.24–1.47)       | –0.02% (–0.02–<br>–0.02) |
| Zimbabwe                              | 0 (0–1)            | 0 (0–0.01)            | 1 (0–1)             | 0 (0–0.01)                | 0.42% (0.24–0.69)       | 0% (0–0)                 |

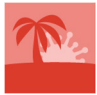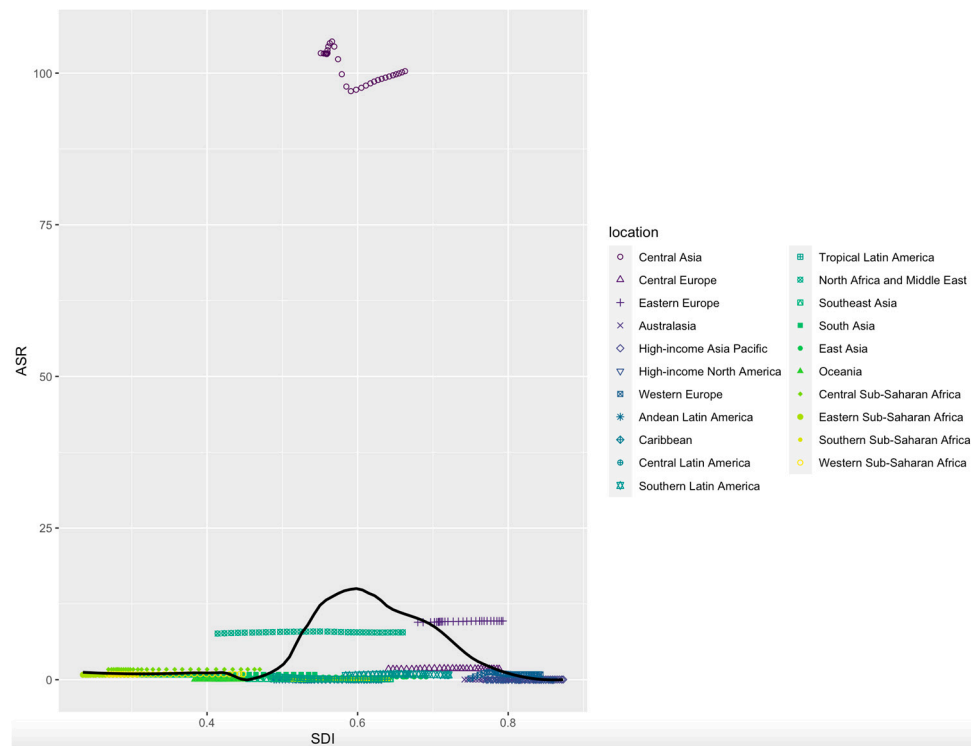

**Figure S1.** Association between age-standardized incidence of cystic echinococcosis and SDI in 21 GBD regions from 1990 to 2019.

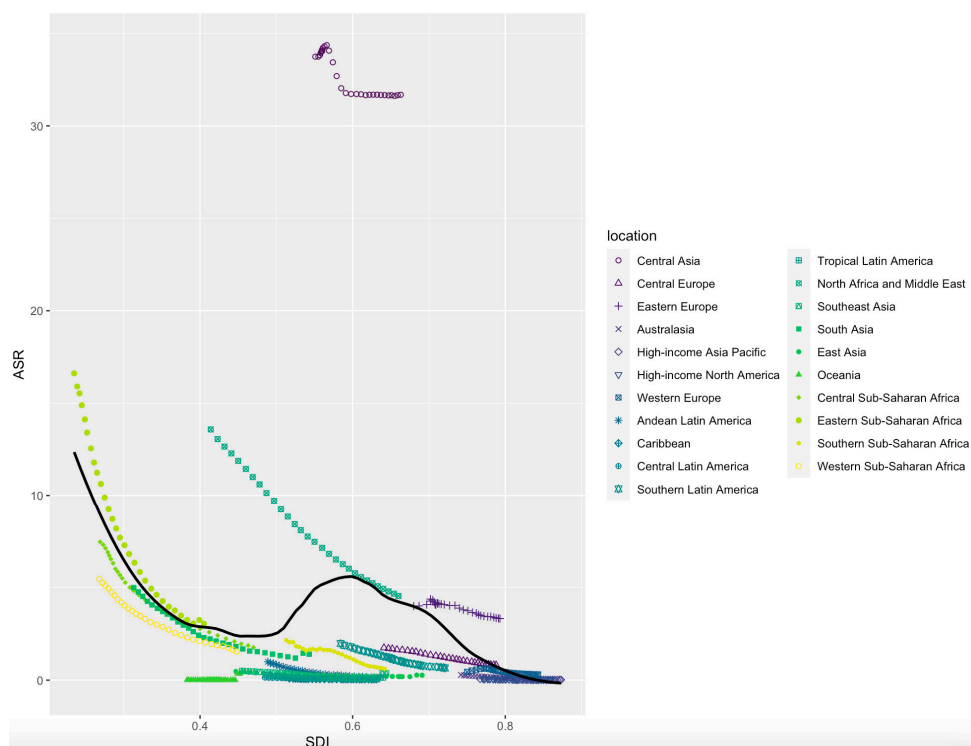

**Figure S2.** Association between age-standardized DALY rate of cystic echinococcosis and SDI in 21 GBD regions from 1990 to 2019.
